# Supplementary material for: Moxibustion is an Alternative in Treating Knee Osteoarthritis: The Evidence From Systematic Review and Meta-Analysis
Source: PubMed Central journal article supplement — Medicine (Baltimore). 2016 Feb 12;95(6):e2790. doi: 10.1097/MD.0000000000002790 (PMC4753935; doi:10.1097/md.0000000000002790), 2016-02-12

### A. Physical function - Short-term

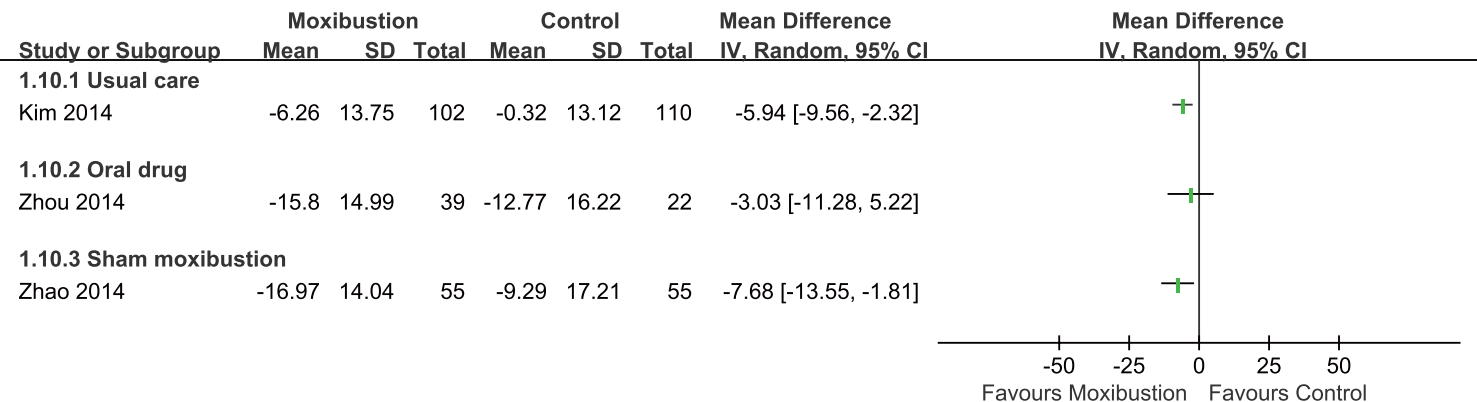

### B. Physical function - Mid-term

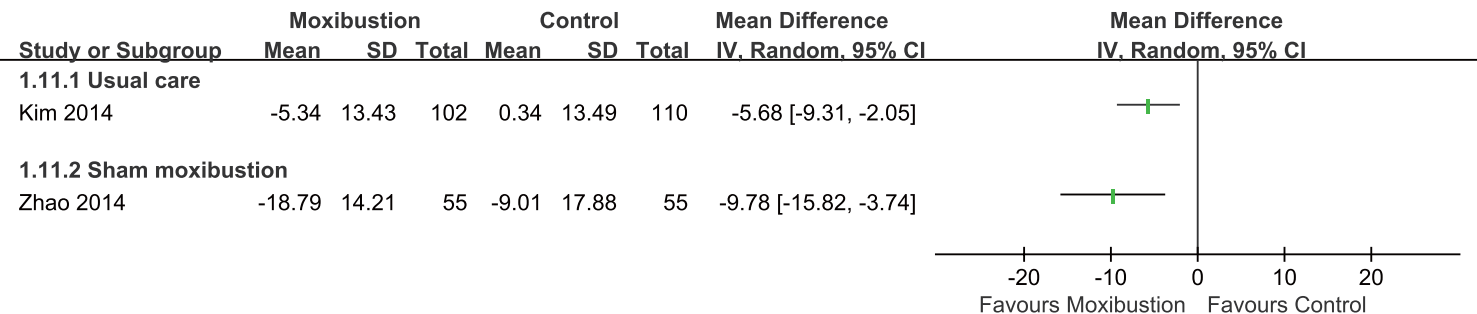

### C. Physical function - Long-term - Sham moxibustion

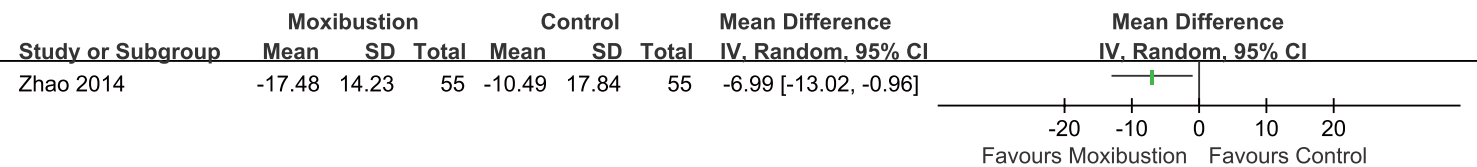

## 1. Search algorithm of Embase

| No. | Query                                                | Results |
|-----|------------------------------------------------------|---------|
| #12 | #1 AND #7 AND #11                                    | 105     |
| #11 | #8 OR #9 OR #10                                      | 672751  |
| #10 | 'randomized controlled trial'/exp                    | 383248  |
| #9  | 'randomized controlled trial (topic)'/exp            | 85166   |
| #8  | random\$                                             | 224863  |
| #7  | #2 OR #3 OR #4 OR #5 OR #6                           | 105554  |
| #6  | 'osteoarthritis'/exp OR osteoarthritis AND deformans | 543     |
| #5  | degenerative AND arthritis\$                         | 1       |
| #4  | osteoarthros\$                                       | 1       |
| #3  | osteoarthriti\$                                      | 4       |
| #2  | 'osteoarthritis'/exp OR 'osteoarthritis'             | 105527  |
| #1  | 'moxibustion'/exp OR 'moxibustion'                   | 6458    |

## 2. Search algorithm of PubMed

| NO. | Query                                                                                                                                                                                                                                                                                                                                                                                                      | Results |
|-----|------------------------------------------------------------------------------------------------------------------------------------------------------------------------------------------------------------------------------------------------------------------------------------------------------------------------------------------------------------------------------------------------------------|---------|
| #10 | Search (((("Moxibustion"[Mesh]) OR moxibustion[Title/Abstract])) AND ((("Osteoarthritis"[Mesh]) OR (((Osteoarthriti*[Title/Abstract]) OR Degenerative Arthriti*[Title/Abstract]) OR Osteoarthros*[Title/Abstract]) OR Osteoarthritis Deformans[Title/Abstract]))) AND (((("Randomized Controlled Trial" [Publication Type]) OR "Randomized Controlled Trials as Topic"[Mesh])) OR random*[Title/Abstract]) | 41      |
| #9  | Search (((("Randomized Controlled Trial" [Publication Type]) OR "Randomized Controlled Trials as Topic"[Mesh])) OR random*[Title/Abstract])                                                                                                                                                                                                                                                                | 959251  |
| #8  | Search random*[Title/Abstract]                                                                                                                                                                                                                                                                                                                                                                             | 808405  |
| #7  | Search ("Randomized Controlled Trial" [Publication Type]) OR "Randomized Controlled Trials as Topic"[Mesh]                                                                                                                                                                                                                                                                                                 | 493633  |
| #6  | Search ("Osteoarthritis"[Mesh]) OR (((Osteoarthriti*[Title/Abstract]) OR Degenerative Arthriti*[Title/Abstract]) OR Osteoarthros*[Title/Abstract]) OR Osteoarthritis Deformans[Title/Abstract])                                                                                                                                                                                                            | 64548   |
| #5  | Search (((Osteoarthriti*[Title/Abstract]) OR Degenerative Arthriti*[Title/Abstract]) OR Osteoarthros*[Title/Abstract]) OR Osteoarthritis Deformans[Title/Abstract]                                                                                                                                                                                                                                         | 48485   |
| #4  | Search "Osteoarthritis"[Mesh]                                                                                                                                                                                                                                                                                                                                                                              | 46420   |
| #3  | Search ("Moxibustion"[Mesh]) OR moxibustion[Title/Abstract]                                                                                                                                                                                                                                                                                                                                                | 1861    |
| #2  | Search moxibustion[Title/Abstract]                                                                                                                                                                                                                                                                                                                                                                         | 1704    |
| #1  | Search "Moxibustion"[Mesh]                                                                                                                                                                                                                                                                                                                                                                                 | 1273    |

### 3. Search algorithm of CENTRAL

| NO. | Query                                                                                                                                                          | Results |
|-----|----------------------------------------------------------------------------------------------------------------------------------------------------------------|---------|
| #1  | "moxibustion":ti,ab,kw (Word variations have been searched)                                                                                                    | 803     |
| #2  | MeSH descriptor: [Moxibustion] explode all trees                                                                                                               | 256     |
| #3  | #1 or #2                                                                                                                                                       | 803     |
| #4  | Osteoarthriti*:ti,ab,kw or Degenerative Arthriti*:ti,ab,kw or Osteoarthros*:ti,ab,kw or Osteoarthrosis Deformans:ti,ab,kw (Word variations have been searched) | 7331    |
| #5  | MeSH descriptor: [Osteoarthritis] explode all trees                                                                                                            | 3669    |
| #6  | #4 or #5                                                                                                                                                       | 7331    |
| #7  | random*:ti,ab,kw (Word variations have been searched)                                                                                                          | 501386  |
| #8  | MeSH descriptor: [Randomized Controlled Trial] explode all trees                                                                                               | 169     |
| #9  | MeSH descriptor: [Randomized Controlled Trials as Topic] explode all trees                                                                                     | 21241   |
| #10 | #7 or #8 or #9                                                                                                                                                 | 501438  |
| #11 | #3 and #6 and #10                                                                                                                                              | 37      |

### 4. Search algorithm of Chinese Biomedical Literature Database

| NO. | Query                                                                                                                             | Results |
|-----|-----------------------------------------------------------------------------------------------------------------------------------|---------|
| #1  | "艾灸"[常用字段:智能]                                                                                                                     | 5644    |
| #2  | ((("骨关节炎"[不加权:扩展]) OR "骨关节炎, 膝"[不加权:扩展]) OR "骨关节炎, 髌"[不加权:扩展])                                                                    | 31346   |
| #3  | (((((("骨关节炎"[常用字段:智能]) OR "骨性关节炎"[常用字段:智能]) OR "骨关节病"[常用字段:智能]) OR "退行性关节炎"[常用字段:智能]) OR "老年性关节炎"[常用字段:智能]) OR "肥大性关节炎"[常用字段:智能]) | 35905   |
| #4  | ("随机对照试验"[不加权:扩展]) OR "随机对照试验(主题)"[不加权:扩展]                                                                                        | 279875  |
| #5  | "随机"[常用字段:智能]                                                                                                                     | 850555  |
| #6  | (#4) OR (#3)                                                                                                                      | 35905   |
| #7  | (#6) OR (#5)                                                                                                                      | 850555  |
| #8  | (#8) AND (#7) AND (#2)                                                                                                            | 92      |

## Essential Information Extraction Table Pre-designed by Tian Xu

| <b>Basic Characteristics of Included into Study</b> |                                            |         |                 |       |               |
|-----------------------------------------------------|--------------------------------------------|---------|-----------------|-------|---------------|
| Study Information                                   | Author                                     |         | Year            |       | Country       |
|                                                     |                                            |         |                 |       |               |
| Methods                                             | Allocation                                 |         |                 |       |               |
|                                                     | Duration                                   |         |                 |       |               |
|                                                     | Blinding                                   |         |                 |       |               |
|                                                     | Location                                   |         |                 |       |               |
| Participants                                        | Diagnosis                                  |         |                 |       |               |
|                                                     | Age                                        |         | Study Group     |       | Control Group |
|                                                     |                                            |         |                 |       |               |
|                                                     | Sex                                        |         | Study Group     |       | Control Group |
|                                                     |                                            |         | Male: Female    |       | Male: Female  |
|                                                     | Length of Illness                          |         | Study Group     |       | Control Group |
|                                                     |                                            |         | ±               |       | ±             |
| Inclusion criteria                                  |                                            |         |                 |       |               |
| Exclusion criteria                                  |                                            |         |                 |       |               |
| Interventions                                       | Treatment Group                            | Content |                 |       |               |
|                                                     | Control group                              | Content |                 |       |               |
| Outcomes                                            |                                            |         |                 |       |               |
| Notes                                               |                                            |         |                 |       |               |
| Drop-Outs                                           | Drop out due to                            |         | Study group     |       | Control group |
|                                                     | the numbers of patients in the early stage |         |                 |       |               |
|                                                     | the numbers of patients in the late stage  |         |                 |       |               |
| Continuous Data                                     |                                            |         |                 |       |               |
| Outcomes                                            | Name of outcome                            |         | Data Extraction |       |               |
|                                                     |                                            |         | Mean            | SD    | N             |
|                                                     | Study group                                |         |                 |       |               |
|                                                     | Control group                              |         |                 |       |               |
| Binary Data                                         |                                            |         |                 |       |               |
| Outcomes                                            | Name of Outcome                            |         | Data Extraction |       |               |
|                                                     |                                            |         | Event number    |       | Total number  |
|                                                     | Study group                                |         |                 |       |               |
|                                                     | Control group                              |         |                 |       |               |
| Other Type Data                                     |                                            |         |                 |       |               |
| Outcomes                                            | Name of Outcome                            |         | Data Extraction |       |               |
|                                                     |                                            |         | Median          | Range | N             |
|                                                     | Study group                                |         |                 |       |               |
|                                                     | Control group                              |         |                 |       |               |

## Essential Information Extraction Table Pre-designed by Tian Xu

| <b>Assessing of Risk of Bias Tool</b>         |                                                                                                                                                                                                                                                                                                                                                                                       |                                                                                         |
|-----------------------------------------------|---------------------------------------------------------------------------------------------------------------------------------------------------------------------------------------------------------------------------------------------------------------------------------------------------------------------------------------------------------------------------------------|-----------------------------------------------------------------------------------------|
| Item                                          | Description                                                                                                                                                                                                                                                                                                                                                                           | Risk of Bias                                                                            |
| <b>Sequence Generation</b>                    | Describe the method used to generate the allocation sequence in sufficient detail to allow an assessment of whether it should produce comparable groups                                                                                                                                                                                                                               | Was the allocation sequence adequately                                                  |
|                                               | Comment:                                                                                                                                                                                                                                                                                                                                                                              | Unclear                                                                                 |
| <b>Allocation Concealment</b>                 | Describe the method used to conceal the allocation sequence in sufficient detail to determine whether intervention allocations could have been foreseen                                                                                                                                                                                                                               | Was the allocation adequately concealed?                                                |
|                                               | Comment:                                                                                                                                                                                                                                                                                                                                                                              | Unclear                                                                                 |
| <b>Blinding of Participants and Personnel</b> | Describe all measures used, if any, to blind study participants and personnel from knowledge of which intervention a participant received. Provide any information relating to whether the intended blinding was effective                                                                                                                                                            | Was knowledge of the allocated intervention adequately prevented during                 |
|                                               | Comment:                                                                                                                                                                                                                                                                                                                                                                              | Unclear                                                                                 |
| <b>Blinding of Outcome Assessors</b>          | Describe all measures used, if any, to blind outcome assessors from knowledge of which intervention a participant received. Provide any information relating to whether the intended blinding was effective.                                                                                                                                                                          | Was knowledge of the allocated intervention adequately                                  |
|                                               | Comment:                                                                                                                                                                                                                                                                                                                                                                              | Unclear                                                                                 |
| <b>Incomplete Outcome Data</b>                | Describe the completeness of outcome data for each main outcome, including attrition and exclusions from the analysis. State whether attrition and exclusions were reported, the numbers in each intervention group (compared with total randomized participants), reasons for attrition/exclusions where reported, and any reinclusions in analyses performed by the review authors. | Were incomplete outcome data adequately addressed?                                      |
|                                               | Comment:                                                                                                                                                                                                                                                                                                                                                                              | Low Risk                                                                                |
| <b>Selective Outcome Reporting</b>            | State how the possibility of selective outcome reporting was examined by the review authors and what was found.                                                                                                                                                                                                                                                                       | Are reports of the study free of suggestion of                                          |
|                                               | Comment:                                                                                                                                                                                                                                                                                                                                                                              | Low Risk                                                                                |
| <b>Other Bias</b>                             | State any important concerns about bias not addressed in the other domains in the tool. If particular questions/entries were re-specified in the review protocol, responses should be provided for each question/entry                                                                                                                                                                | Was the study apparently free of other problems that could put it at high risk of bias? |
|                                               | Comment:                                                                                                                                                                                                                                                                                                                                                                              | Low Risk                                                                                |

### A. GPCRND score - Intra-articular injection (Continuous data)

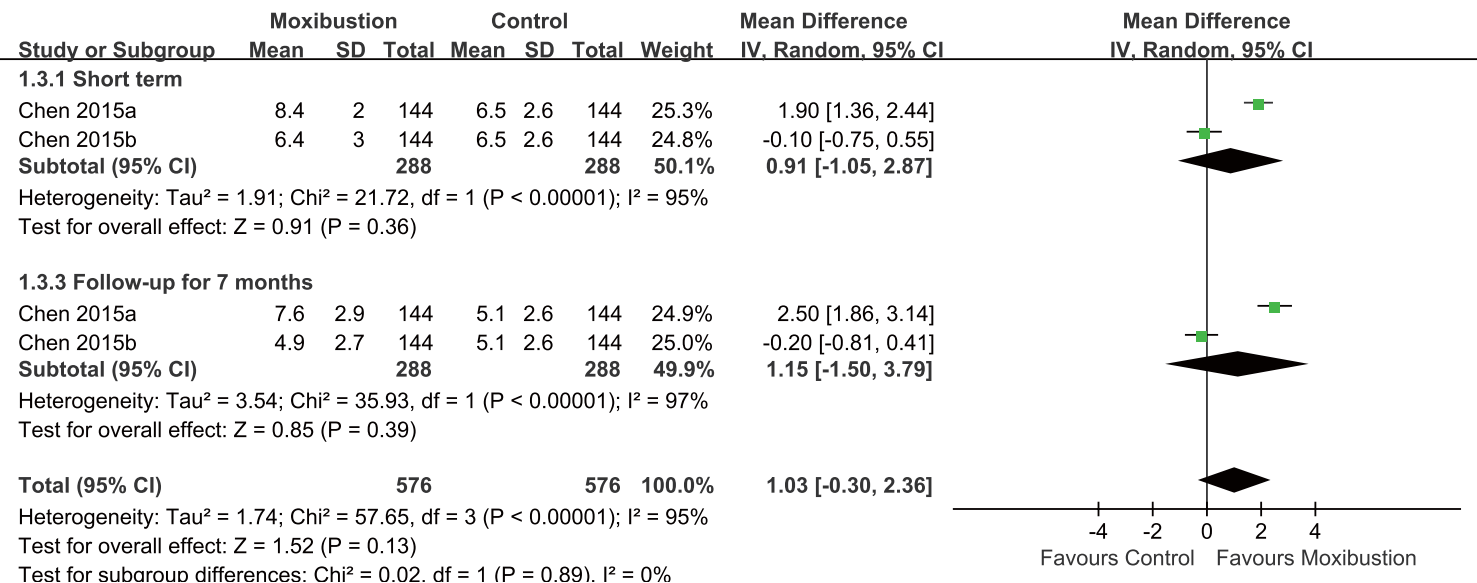

### B. WOMAC score - Usual care (Continuous data)

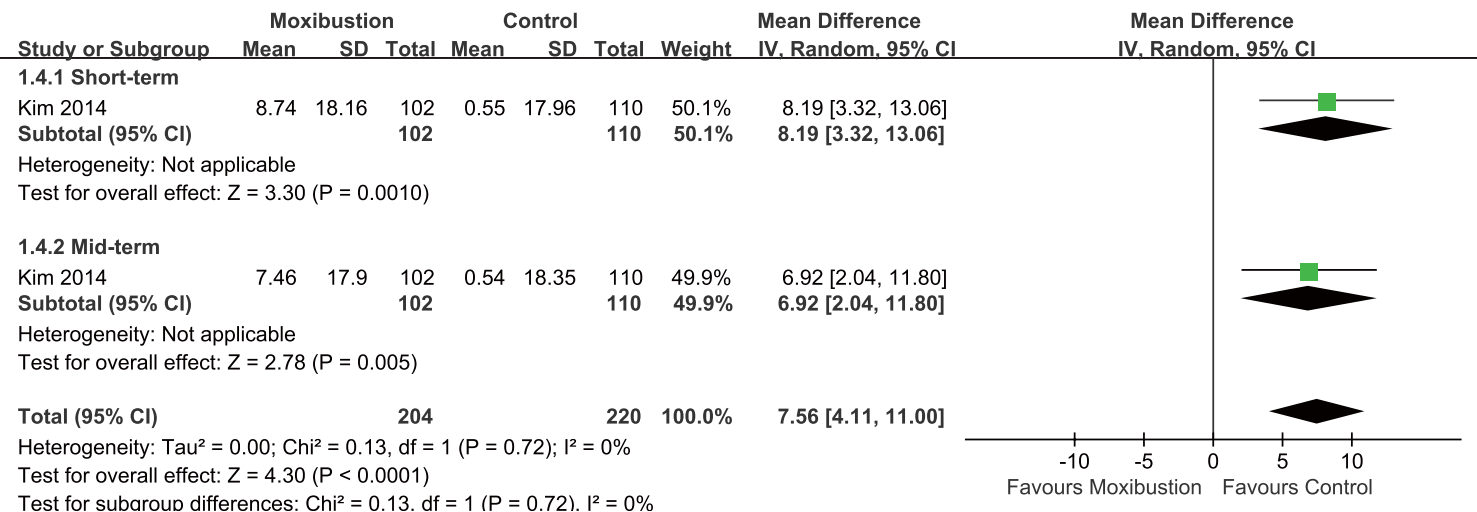

Supplement: medi-95-e2790-s001.pdf [file medi-95-e2790-s001.pdf]
